# Supplementary material for: Methylation deficiency disrupts biological rhythms from bacteria to humans
Source: Springer Nature journal article supplement (doi:10.1038/s42003-020-0942-0), 2020-05-06
Supplement: 42003_2020_942_MOESM2_ESM.pdf [file 42003_2020_942_MOESM2_ESM.pdf]

## Description of Additional Supplementary Files

**File Name: Supplementary Movie 1**

**Description:** Animated structural superposition of AHCY from the 9 organisms investigated here, using human (1LI4), mouse (5AXA) or lupin (3OND) crystal structures as templates. The blue loop is specific to plants and green algae; DZnep is shown in yellow, NAD<sup>+</sup> in grey.

**File Name: Supplementary Movie 2**

**Description:** Time-lapse luminescence recordings of one representative embryo for each treatment.

**File Name: Supplementary Movie 3**

**Description:** Time-lapse luminescence recordings of one representative embryo for each treatment, with luminescence shown as a pseudo-color green and merged with brightfield micrographs. The red arrows indicate the appearance of new somites.

**File Name: Supplementary Data 1**

**Description:** Raw luminescence data and other quantifications related to all main figures.
